# Supplementary material for: Association of viral variant and vaccination status with the occurrence of symptoms compatible with post-acute sequelae after primary SARS-CoV-2 infection
Source: bioRxiv or medRxiv preprint supplement (doi:10.1101/2022.10.21.22281349), 2022-10-22

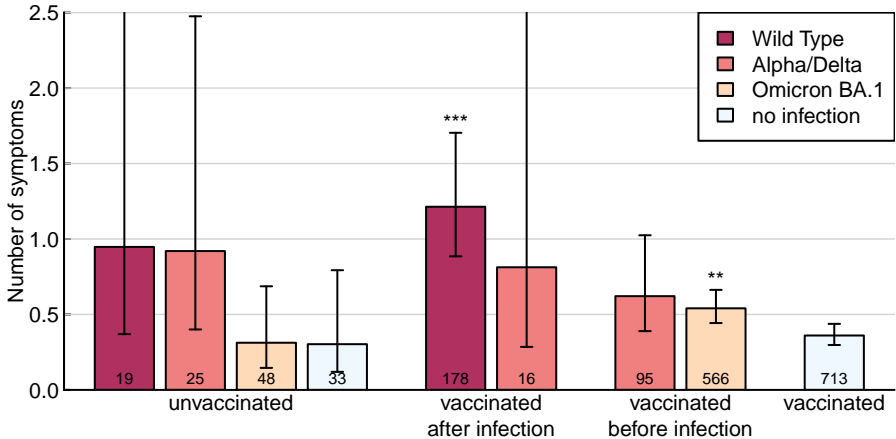

Supplement: Supplementary file [file media-4.pdf]
